# Supplementary material for: Thymine DNA glycosylase exhibits negligible affinity for nucleobases that it removes from DNA
Source: PubMed Central journal article supplement (PMC4627079; doi:10.1093/nar/gkv890), 2015-09-10
Supplement: supp_gkv890_nar-01113-f-2015-File008.pdf [file supp_gkv890_nar-01113-f-2015-File008.pdf]

**Supplementary Data for:**

**Thymine DNA glycosylase exhibits negligible affinity for nucleobases  
that it removes from DNA**

Shuja S. Malik<sup>1</sup>, Christopher T. Coey<sup>1</sup>, Kristen M. Varney<sup>1,2,3</sup>, Edwin Pozharski<sup>1,2,3,\*</sup>, and Alexander C.  
Drohat<sup>1,2,\*</sup>

<sup>1</sup> Department of Biochemistry and Molecular Biology, University of Maryland School of Medicine,  
Baltimore, MD 21201, USA

<sup>2</sup> University of Maryland Marlene and Stewart Greenebaum Cancer Center, Baltimore, MD 21201, USA

<sup>3</sup> Center for Biomolecular Therapeutics, Institute for Bioscience and Biotechnology Research, Rockville,  
MD 20850, USA

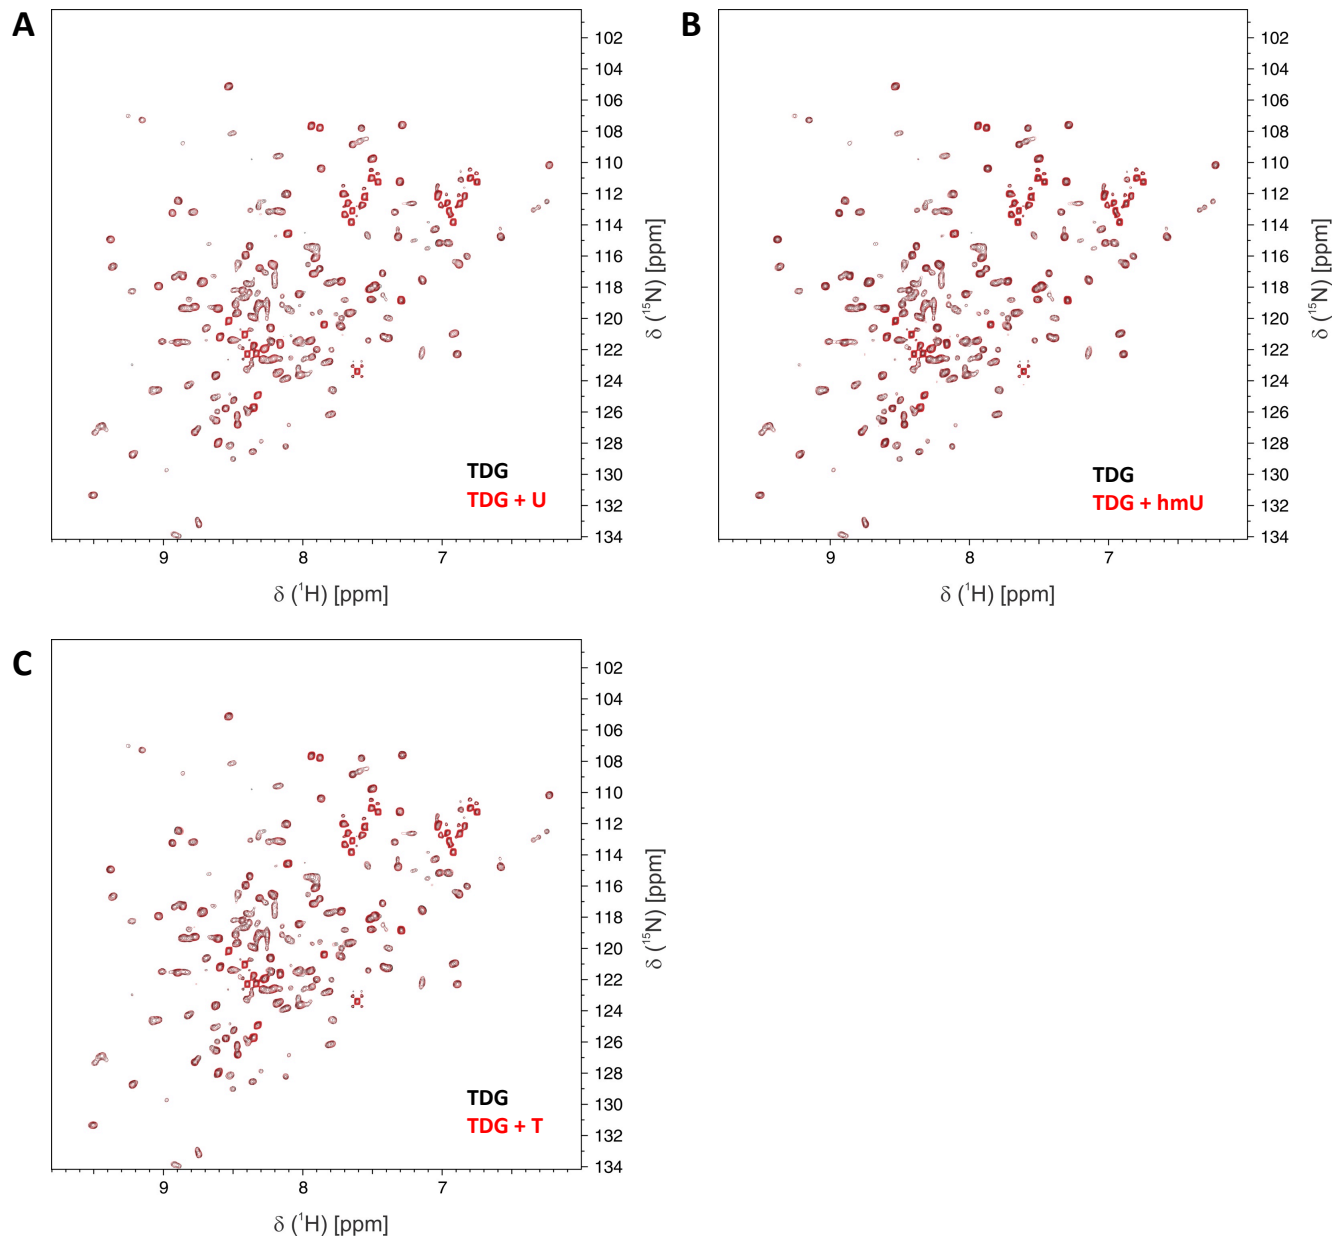

**Figure S1.** TDG<sup>cat</sup> exhibits no appreciable binding to uracil, thymine, or hmU. All three panels shown an identical <sup>15</sup>N-HSQC spectrum for free TDG<sup>cat</sup> (black peaks). The red peaks in panels A-C are <sup>15</sup>N-HSQC spectra for TDG<sup>cat</sup> together with a 10 mM concentration of uracil (A), thymine (B), or hmU (C). No substantial chemical shift differences are observed in any of the three panels, indicating that TDG<sup>cat</sup> does not bind detectably to any of the three bases. Samples contained 0.54 mM <sup>15</sup>N-labeled TDG<sup>cat</sup>, 20 mM sodium phosphate pH 6.5, 0.15 M NaCl, 0.2 mM DTT, 0.2 mM EDTA, 7% D<sub>2</sub>O.

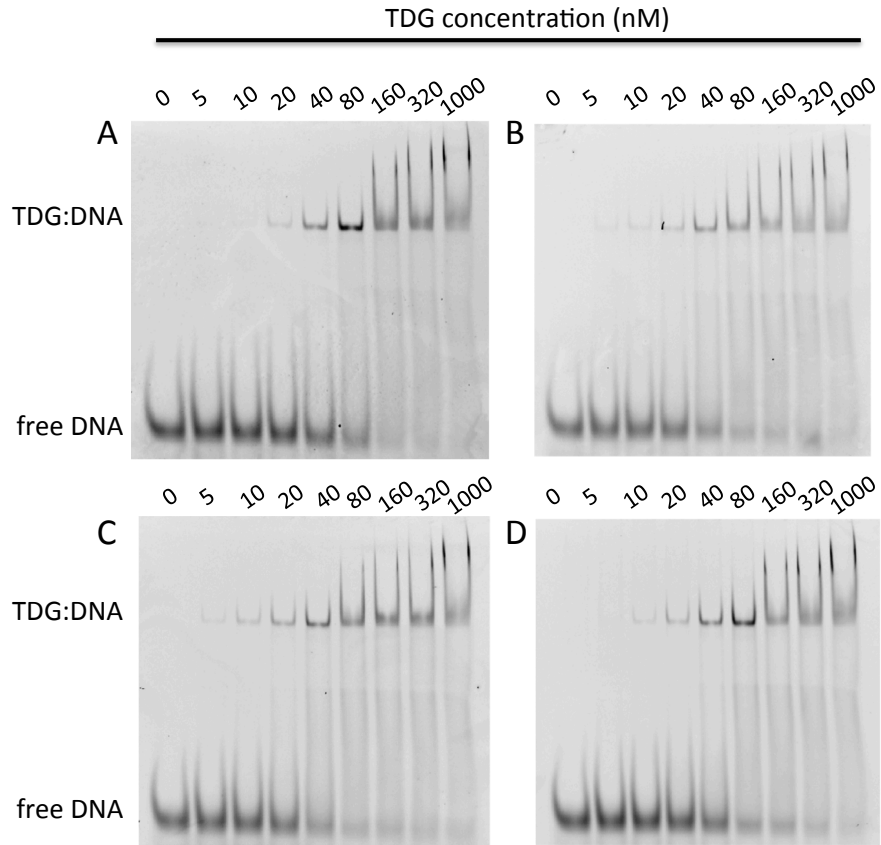

**Figure S2.** Binding of TDG to DNA containing a G·T<sup>F</sup> analog is not altered by nucleobases. Electrophoretic mobility shift assays (EMSAs) were performed for TDG (full length) binding to a 28 bp DNA containing a G·T<sup>F</sup> mispair, where T<sup>F</sup> is 2'-fluoroarabino-dT, a dT analog that flips into the active site but is not excised by TDG. The four panels show EMSAs performed under identical conditions for TDG binding to G·T<sup>F</sup> DNA in the absence of a nucleobase (**A**) and in the presence of 10 mM concentration of (**B**) uracil, (**C**) thymine, and (**D**) hmU. The concentration of DNA (6-FAM labeled) was 10 nM, and the TDG concentration was varied as shown at the top of the gels. The results suggest a  $K_d$  of roughly 40 nM and indicate that the nucleobases do not alter TDG binding to G·T<sup>F</sup> DNA.

**Supplementary Table S1. Data collection and refinement statistics**

|                                       | EP from GhmU<br>(PDBID: 4XEG) | EP from GfC<br>(PDBID: 4Z7B) | EP from GT,<br>(PDBID: 4Z7Z) | EP from GU, excess U<br>(PDBID: 4Z47) | EP; GU, no acetate<br>(PDBID: 4Z3A) | EP from GcaC<br>(PDBID: 5CYS) |
|---------------------------------------|-------------------------------|------------------------------|------------------------------|---------------------------------------|-------------------------------------|-------------------------------|
| <b>Data collection</b>                |                               |                              |                              |                                       |                                     |                               |
| Space Group                           | C2                            | C2                           | C2                           | C2                                    | C2                                  | C2                            |
| Cell Dimensions<br><i>a, b, c</i> (Å) | 89.2, 53.4, 82.2              | 96.2, 53.8, 81.2             | 90.7, 53.5, 82.0             | 89.3, 53.3, 82.3                      | 95.2, 53.6, 81.4                    | 97.9, 53.8, 81.2              |
| $\beta$ (°)                           | 95.4                          | 95.6                         | 95.5                         | 95.3                                  | 95.1                                | 96.1                          |
| Resolution (Å)                        | 39-1.72 (1.75-1.72)           | 33-2.02 (2.07-2.02)          | 39-1.83 (1.87-1.83)          | 46-1.45 (1.47-1.45)                   | 32-1.72 (1.76-1.72)                 | 33-2.45 (2.55-2.45)           |
| $R_{pim}$                             | 0.127                         | 0.055                        | 0.055                        | 0.027                                 | 0.059                               | 0.113                         |
| Mean $I/\sigma I$                     | 23.8 (1.4)                    | 10.1 (0.7)                   | 10.2 (0.4)                   | 15.9 (1.2)                            | 6.6 (0.6)                           | 5.2 (0.6)                     |
| $CC_{1/2}$                            | 0.997 (0.5)                   | 0.998 (0.36)                 | 0.992 (0.3)                  | 0.999 (0.65)                          | 0.997 (0.3)                         | 0.992 (0.34)                  |
| Completeness (%)                      | 97.2 (62.1)                   | 98.8 (95.4)                  | 98.5 (91.5)                  | 94.9 (89.8)                           | 97.7 (92.4)                         | 99.5 (96.9)                   |
| Redundancy                            | 6.6 (3.8)                     | 5.0 (4.8)                    | 8.8 (3.0)                    | 11.7 (11.0)                           | 8.8 (4.6)                           | 4.9 (4.7)                     |
| Wilson B-factor (Å <sup>2</sup> )     | 29.8                          | 32.3                         | 34.7                         | 23.5                                  | 23.1                                | 49.4                          |
| <b>Refinement</b>                     |                               |                              |                              |                                       |                                     |                               |
| Program                               | REFMAC5                       | BUSTER-TNT                   | BUSTER-TNT                   | REFMAC5                               | BUSTER-TNT                          | BUSTER-TNT                    |
| Resolution (Å)                        | 39-1.72                       | 32-2.02                      | 39.3-1.83                    | 46-1.45                               | 32-1.72                             | 33-2.45                       |
| No. of reflections                    | 38,012                        | 26,944                       | 34,036                       | 61,716                                | 42,189                              | 15,396                        |
| $R_{work}/R_{free}$                   | 0.188/0.232                   | 0.187/0.233                  | 0.193/0.237                  | 0.140/0.195                           | 0.199/0.226                         | 0.165/0.227                   |
| Number of atoms                       |                               |                              |                              |                                       |                                     |                               |
| Protein                               | 1590                          | 1530                         | 1560                         | 1591                                  | 1571                                | 1558                          |
| DNA                                   | 1176                          | 1135                         | 1176                         | 1176                                  | 1188                                | 1176                          |
| Water                                 | 304                           | 144                          | 209                          | 281                                   | 185                                 | 210                           |
| Other                                 | 20                            | 12                           | 8                            | 16                                    |                                     | 4                             |
| B-factors (Å <sup>2</sup> )           |                               |                              |                              |                                       |                                     |                               |
| Protein                               | 34.6                          | 46.2                         | 49.0                         | 33.8                                  | 43.1                                | 65.0                          |
| DNA                                   | 45.4                          | 72.5                         | 65.3                         | 43.6                                  | 58.4                                | 93.1                          |
| Water                                 | 47.2                          | 54.4                         | 53.6                         | 46.8                                  | 50.4                                | 51.6                          |
| Acetate                               | 32.9                          | 47.6                         | 40.1                         | 29.8                                  | -                                   | 57.0                          |
| Ramachandran Plot                     |                               |                              |                              |                                       |                                     |                               |
| Favoured (%)                          | 96                            | 97.5                         | 98                           | 98                                    | 98                                  | 95                            |
| Allowed (%)                           | 2                             | 2                            | 2                            | 2                                     | 2                                   | 4.5                           |
| Outliers (%)                          | 2                             | 0.5                          | 0                            | 0                                     | 0                                   | 0.5                           |
| RMSD from ideal                       |                               |                              |                              |                                       |                                     |                               |
| Bond lengths (Å)                      | 0.017                         | 0.010                        | 0.010                        | 0.023                                 | 0.010                               | 0.010                         |
| Bond angles (°)                       | 1.90                          | 1.01                         | 0.99                         | 2.30                                  | 0.99                                | 1.04                          |

Values shown in parenthesis are for highest resolution shell. The Ramachandran analysis was performed using Molprobit [1]. Wilson B-factor estimated by phenix.xtriage. Number of atoms includes all atom records explicitly included in the model, including alternate positions.

1. Chen, V.B., W.B. Arendall, III, J.J. Headd, D.A. Keedy, R.M. Immormino, G.J. Kapral, L.W. Murray, J.S. Richardson, and D.C. Richardson, *MolProbity: all-atom structure validation for macromolecular crystallography*. Acta Crystallographica Section D, 2010. **66**(1): p. 12-21.
